# Supplementary material for: Effects of soy protein and isoflavones on circulating hormone concentrations in pre- and post-menopausal women: a systematic review and meta-analysis
Source: PubMed Central journal article supplement — Hum Reprod Update. 2009 Mar 19;15(4):423–40. doi: 10.1093/humupd/dmp010 (PMC2691652; doi:10.1093/humupd/dmp010), 2009-03-19
Supplement: dmp010_1.pdf [file dmp010_1.pdf]

## Effect of soy and isoflavones on hormones in women: a systematic review and meta-analysis

Supplemental data Table S1. Quality of included studies

| Study                    | Randomised | Masking of   |                   | Industry funding or involvement                                                                            | Duration | Compliance assessed & reported | Isoflavones in intervention & control reported | Isoflavones analyzed | Dropouts    | Risk of bias |
|--------------------------|------------|--------------|-------------------|------------------------------------------------------------------------------------------------------------|----------|--------------------------------|------------------------------------------------|----------------------|-------------|--------------|
|                          |            | Participants | Outcome assessors |                                                                                                            |          |                                |                                                |                      |             |              |
| Alekel 2000              | Yes        | Yes          | Yes               | None reported                                                                                              | Done     | Partly done                    | Partly done                                    | Unclear              | Done        | Low          |
| Arjmandi 2003            | Yes        | Yes          | Yes               | Yes, funding from Protein Technologies Int.                                                                | Done     | Not done                       | Partly done                                    | Unclear              | Done        | Mod - high   |
| Arjmandi 2005            | Yes        | Yes          | Yes               | Yes, funding from DrSoy Nutrition                                                                          | Done     | Partly done                    | Partly done                                    | Unclear              | Done        | Mod - high   |
| Aubertin-Leheudre 2007   | Yes        | Yes          | Yes               | None reported                                                                                              | Done     | Not done                       | Partly done                                    | Unclear              | Partly done | Mod - high   |
| Baird 1995               | Yes        | No           | Yes               | None reported                                                                                              | Done     | Partly done                    | Partly done                                    | Done                 | Done        | Mod - high   |
| Baum 1998                | Yes        | Yes          | Yes               | Yes, funding & authors from Protein Technologies Ltd                                                       | Done     | Not done                       | Done                                           | Done                 | Partly done | Mod - high   |
| Brink 2008               | Yes        | Yes          | Yes               | None reported                                                                                              | Done     | Done                           | Partly done                                    | Done                 | Done        | Low          |
| Brooks 2004              | Yes        | Yes          | Yes               | None reported relevant to soy                                                                              | Done     | Partly done                    | Partly done                                    | Unclear              | Done        | Low          |
| Brown 2002               | Yes        | Yes          | No                | None reported                                                                                              | Not done | Done                           | Partly done                                    | Done                 | Done        | Mod - high   |
| Cassidy 1995             | No         | Unclear      | Unclear           | None reported                                                                                              | Not done | Partly done                    | Partly done                                    | Unclear              | Done        | Mod - high   |
| Cheng 2007               | Yes        | Yes          | Yes               | Unclear: one or more authors employed by Karolinska Institutet, one disclosed involvement with KaraBio AB. | Done     | Partly done                    | Partly done                                    | Done                 | Partly done | Mod - high   |
| Cuevas 2003              | Yes        | Yes          | Yes               | Yes, funded by Protein Technology International                                                            | Done     | Partly done                    | Partly done                                    | Unclear              | Partly done | Mod - high   |
| D'Anna 2007              | Yes        | Yes          | Yes               | None reported                                                                                              | Done     | Partly done                    | Partly done                                    | Unclear              | Done        | Low          |
| Dewell 2002              | Yes        | Yes          | Yes               | Yes, funded by Archer Daniels                                                                              | Done     | Not done                       | Partly done                                    | Unclear              | Partly done | Mod - high   |
| Duncan 1999 pre          | Yes        | Unclear      | Unclear           | None reported                                                                                              | Done     | Partly done                    | Done                                           | Unclear              | Partly done | Mod - high   |
| Duncan 1999 post         | Yes        | Yes          | Unclear           | None reported                                                                                              | Done     | Not done                       | Done                                           | Unclear              | Done        | Mod - high   |
| Gann 2005 A (usual diet) | Yes        | Unclear      | Unclear           | None reported                                                                                              | Done     | Not done                       | Done                                           | Unclear              | Partly done | Mod - high   |
| Gann 2005                | Yes        | Unclear      | Unclear           | None reported                                                                                              | Done     | Not done                       | Done                                           | Unclear              | Partly done | Mod - high   |

|                                 |     |         |         |                                                                                                           |          |             |             |          |             |            |
|---------------------------------|-----|---------|---------|-----------------------------------------------------------------------------------------------------------|----------|-------------|-------------|----------|-------------|------------|
| <b>B (low fat diet)</b>         |     |         |         |                                                                                                           |          |             |             |          |             |            |
| <b>Gardner 2001</b>             | Yes | Yes     | Yes     | Yes, funded by Shaklee Corp                                                                               | Done     | Done        | Done        | Done     | Done        | Mod - high |
| <b>Garrido 2006</b>             | Yes | Yes     | Yes     | None reported                                                                                             | Done     | Not done    | Partly done | Done     | Done        | Low        |
| <b>Han 2002</b>                 | Yes | Yes     | Yes     | None reported                                                                                             | Done     | Not done    | Done        | Unclear  | Partly done | Low        |
| <b>Harkness 2004</b>            | Yes | Yes     | Yes     | Unclear (MetroHealth Medical Centre)                                                                      | Done     | Done        | Done        | Unclear  | Done        | Mod - high |
| <b>Huang 2006</b>               | Yes | No      | No      | Yes, part funded by Chia Hsin Food and Synthetic Fibre                                                    | Done     | Not done    | Partly done | Unclear  | Not done    | Mod - high |
| <b>Jayagopal 2002</b>           | Yes | Yes     | Yes     | None reported                                                                                             | Done     | Partly done | Done        | Unclear  | Done        | Low        |
| <b>Knight 2001</b>              | Yes | Yes     | Yes     | Yes, funded by Protein Technologies Int                                                                   | Done     | Partly done | Done        | Done     | Done        | Mod - high |
| <b>Kotsopoulos 2000 (PEARL)</b> | Yes | Yes     | Yes     | None reported                                                                                             | Done     | Partly done | Partly done | Done     | Partly done | Mod - high |
| <b>Kumar 2002</b>               | Yes | Yes     | Yes     | None reported                                                                                             | Done     | Partly done | Partly done | Unclear  | Done        | Low        |
| <b>Lichtenstein 2002</b>        | Yes | Yes     | Yes     | None reported                                                                                             | Done     | Partly done | Done        | Done     | Done        | Low        |
| <b>Mackey 2000</b>              | Yes | Yes     | Yes     | Yes, funded by Sanitarium Health Foods                                                                    | Done     | Not done    | Partly done | Unclear  | Partly done | Mod - high |
| <b>Martini 1999</b>             | Yes | Unclear | Unclear | Yes, funded by Minnesota Soybean Research and Promotion Council                                           | Not done | Partly done | Partly done | Unclear  | Done        | Mod - high |
| <b>Maskarinec 2002</b>          | Yes | Yes     | Yes     | Yes, funding from Pharmavite Corp.                                                                        | Done     | Done        | Done        | Done     | Partly done | Mod - high |
| <b>Maskarinec 2004</b>          | Yes | No      | No      | Yes, one or more authors worked for private bodies                                                        | Done     | Done        | Partly done | Done     | Done        | Mod - high |
| <b>Murkies 1995</b>             | Yes | Yes     | Yes     | None reported                                                                                             | Done     | Partly done | Not done    | Not done | Partly done | Mod - high |
| <b>Nahas 2004</b>               | Yes | Yes     | Yes     | None reported                                                                                             | Done     | Not done    | Partly done | Unclear  | Done        | Low        |
| <b>Nagata 1998</b>              | Yes | No      | Unclear | None reported                                                                                             | Not done | Done        | Done        | Done     | Done        | Mod - high |
| <b>Nettleton 2004</b>           | Yes | Unclear | Unclear | None reported                                                                                             | Done     | Partly done | Done        | Unclear  | Done        | Mod - high |
| <b>Nikander 2003</b>            | Yes | Yes     | Yes     | Yes, grants from Research Foundation of Orion Corporation, and Juho Vainio and Yrjö Jahnesson Foundations | Done     | Partly done | Done        | Unclear  | Done        | Mod - high |
| <b>Scambia 2000</b>             | Yes | Yes     | Yes     | Yes, an author worked for Indena SpA                                                                      | Done     | Partly done | Partly done | Done     | Partly done | Mod - high |
| <b>Spence 2005</b>              | Yes | Yes     | Unclear | Yes, funding by the Indiana Soybean Board                                                                 | Done     | Partly done | Partly done | Done     | Done        | Mod - high |
| <b>Squadrito 2002</b>           | Yes | Yes     | Yes     | None reported                                                                                             | Done     | Partly done | Partly done | Unclear  | Partly done | Mod - high |

|                        |     |         |         |                                                                                                        |          |             |             |         |             |            |
|------------------------|-----|---------|---------|--------------------------------------------------------------------------------------------------------|----------|-------------|-------------|---------|-------------|------------|
| <b>Uesugi 2003</b>     | Yes | Unclear | Unclear | Yes, all 3 authors from Fujicco Ltd                                                                    | Done     | Partly done | Done        | Unclear | Partly done | Mod - high |
| <b>Uesugi 2004</b>     | Yes | Yes     | Yes     | Yes, an author worked for MC Medical Inc                                                               | Done     | Done        | Done        | Unclear | Partly done | Mod - high |
| <b>Upmalis 2000</b>    | Yes | Yes     | Yes     | Yes, one or more authors employed by Advanced Care Products, who also funded                           | Done     | Not done    | Partly done | Unclear | Partly done | Mod - high |
| <b>Woods 2000</b>      | Yes | Yes     | Yes     | None reported                                                                                          | Done     | Not done    | Not done    | Unclear | Not done    | Mod - high |
| <b>Wu 2005</b>         | Yes | Yes     | Unclear | None reported                                                                                          | Done     | Done        | Partly done | Done    | Partly done | Mod - high |
| <b>Wu 2006 A&amp;B</b> | Yes | Yes     | Unclear | Yes, funding from Fujicco Co, 1 author works for Fujicco Co., 1 for Saga Neutriceutical Research Inst. | Done     | Partly done | Done        | Unclear | Partly      | Mod - high |
| <b>Zitterman 2004</b>  | Yes | Unclear | Unclear | Yes, Danone Foundation                                                                                 | Not done | Partly done | Partly done | Done    | Done        | Mod - high |

Trial quality characteristics assessed included:

- masking (separately) of participants and outcome assessors (coded as 'yes' where there was a clear and realistic attempt to mask, 'no' where not, or 'unclear'— success of masking was rarely checked in included studies);
- industry funding or involvement (coded as 'yes, industry funding', 'none reported' or 'unclear');
- duration (coded as 'done' for all post-menopausal studies of at least 4 weeks in duration, and pre-menopausal studies of at least 3 cycles duration or 'not done' for shorter pre-menopausal studies);
- assessment and reporting of compliance ('done' when compliance was both assessed and reported, 'partly done' when it was assessed but not reported or reported without any indication of the method used, and 'not done' when neither was addressed adequately);
- Isoflavone content (reported as 'done' when total isoflavone, genistein and daidzein contents reported in both intervention and control, aglycone or glycated form reported, 'partially done' when at some of the above completed, 'not done' when not);
- isoflavones analyzed ('done' when the intervention dose was checked and reported, or 'unclear' if not carried out or not reported); and
- dropouts (reported as 'done' when numbers randomized, completed and analyzed all clear, plus reasons for dropouts given (by intervention arm), 'partially done' when some of the above, 'not done' when not).

Trials were considered to be at low risk of bias if participant and outcome assessor blinding were all coded 'yes', industry funding was not reported, duration was done and dropouts 'done'. All other trials were considered at moderate or high risk of bias.

## Supplementary Figure 1. Effects of soy and isoflavones on circulating total estradiol concentrations in postmenopausal women (SMD analysis, units of standard deviation).

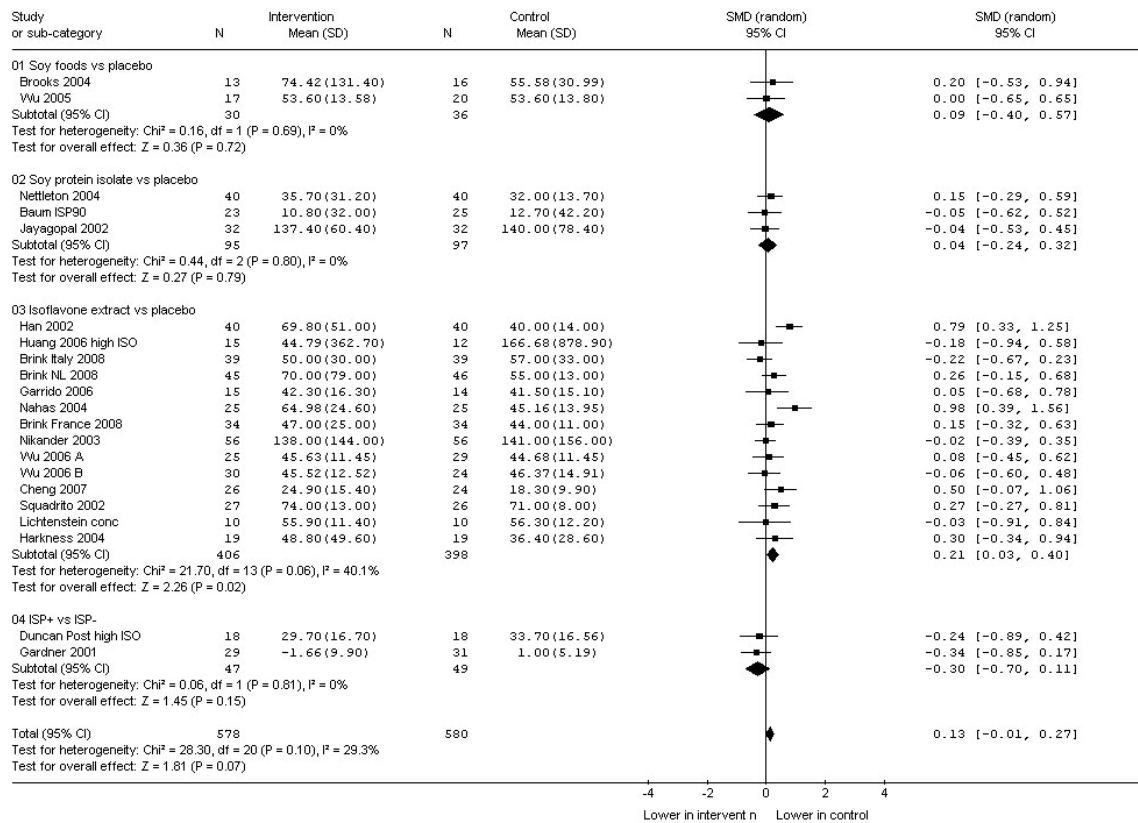

SMD = standardised mean difference, SD = standard deviation, 95% CI = 95% confidence interval.

**Supplementary Figure 2. Effects of soy and isoflavones on circulating FSH concentrations in premenopausal women (SMD analysis, units of standard deviation).**

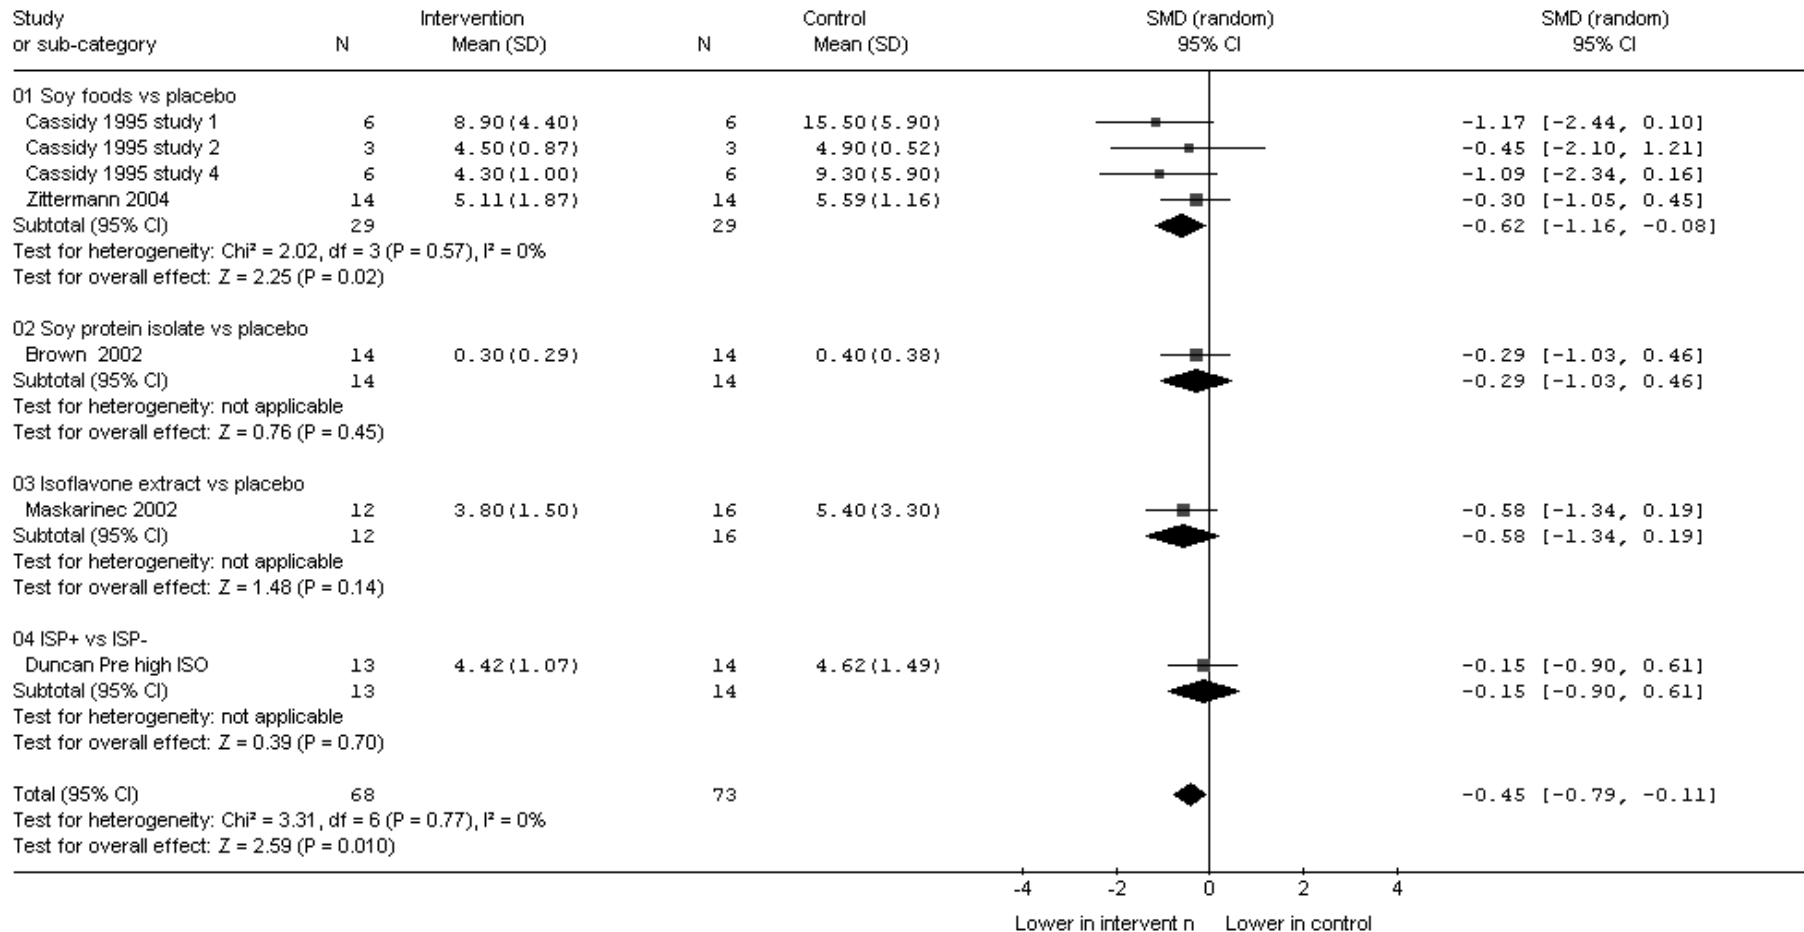

SMD = standardised mean difference, SD = standard deviation, 95% CI = 95% confidence interval.

**Supplementary Figure 3. Effects of soy and isoflavones on circulating LH concentrations in premenopausal women (SMD analysis, units of standard deviation).**

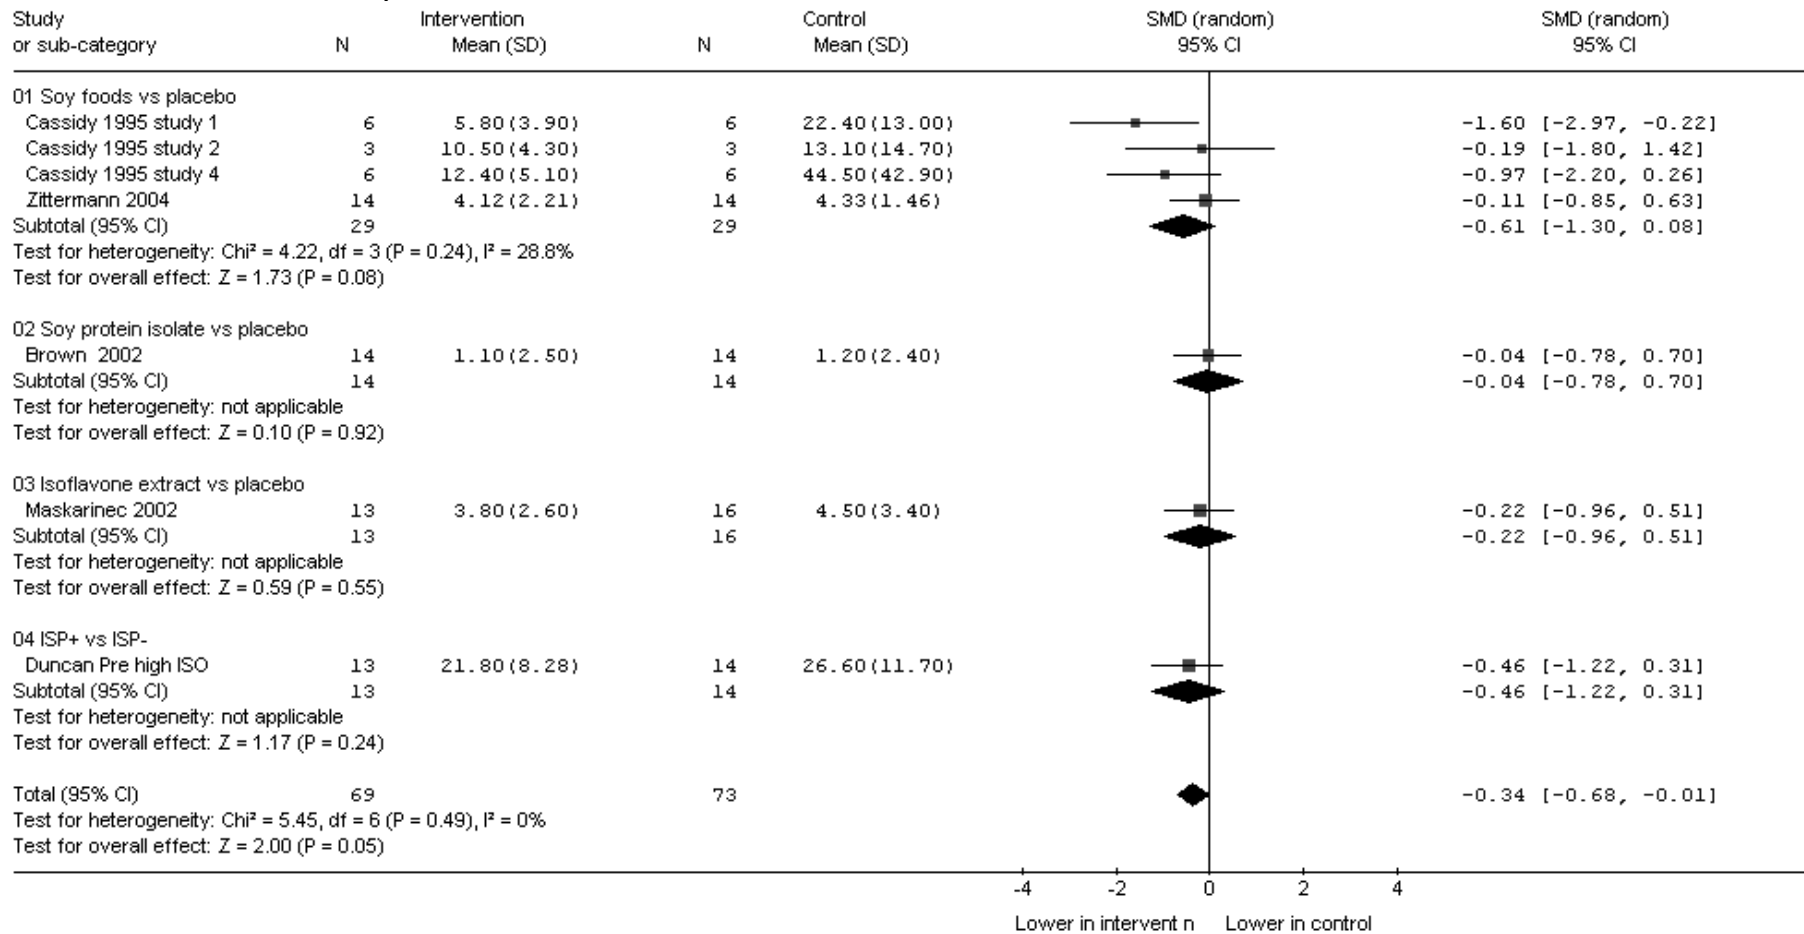

SMD = standardised mean difference, SD = standard deviation, 95% CI = 95% confidence interval.

**Supplementary Figure 4. Effects of soy and isoflavones on menstrual cycle length in premenopausal women (MD analysis, units are days).**

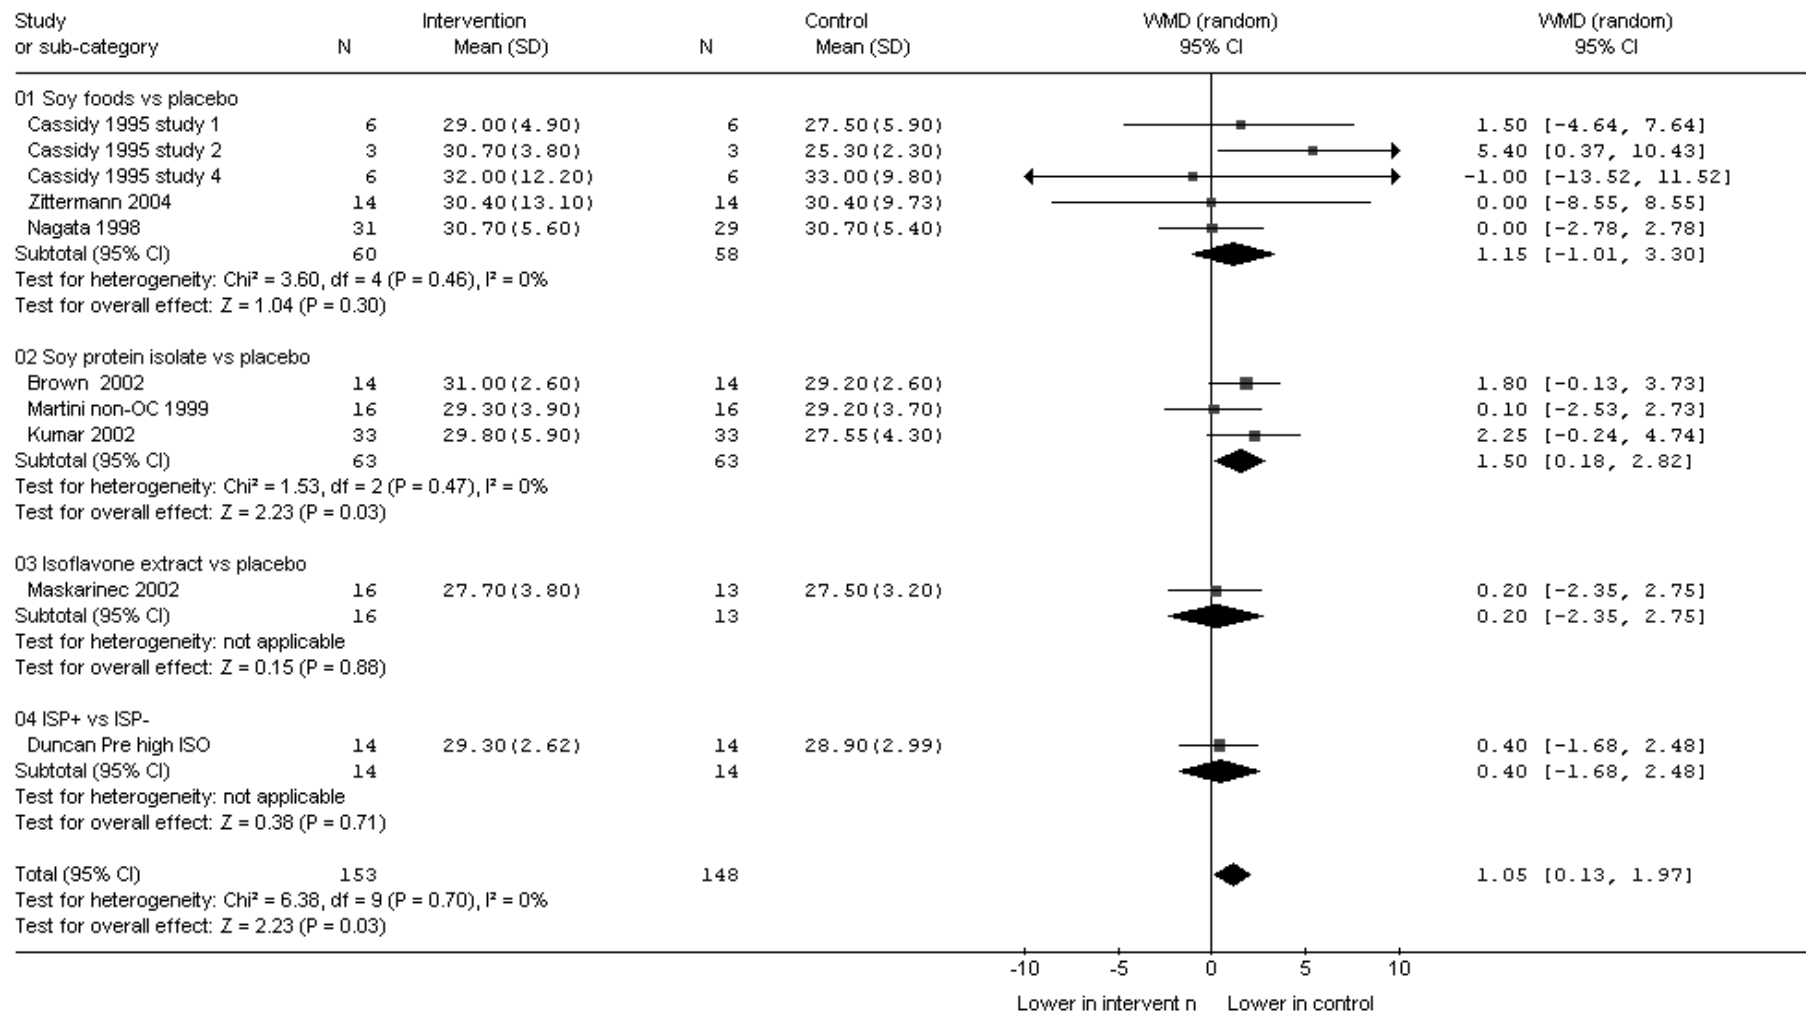

MD = (weighted) mean difference, SD = standard deviation, 95% CI = 95% confidence interval.
